# Supplementary material for: Cancer detection rates of the PI-RADSv2.1 assessment categories: systematic review and meta-analysis on lesion level and patient level
Source: PubMed Central journal article supplement (PMC9184264; doi:10.1038/s41391-021-00417-1), 2021-07-06
Supplement: 41391_2021_417_MOESM1_ESM.pdf [file 41391_2021_417_MOESM1_ESM.pdf]

Supplementary figure 1 (patient level, outcome: cs cancer)

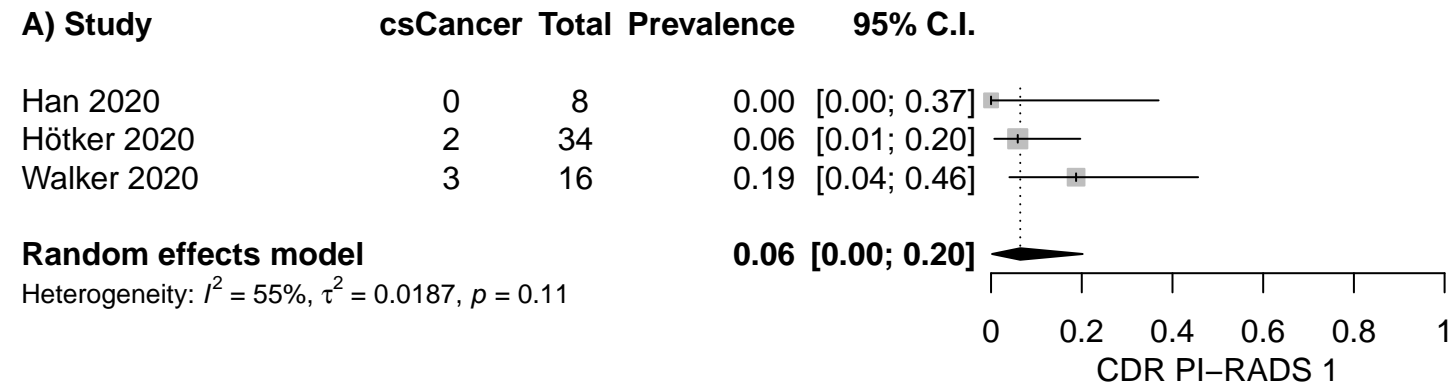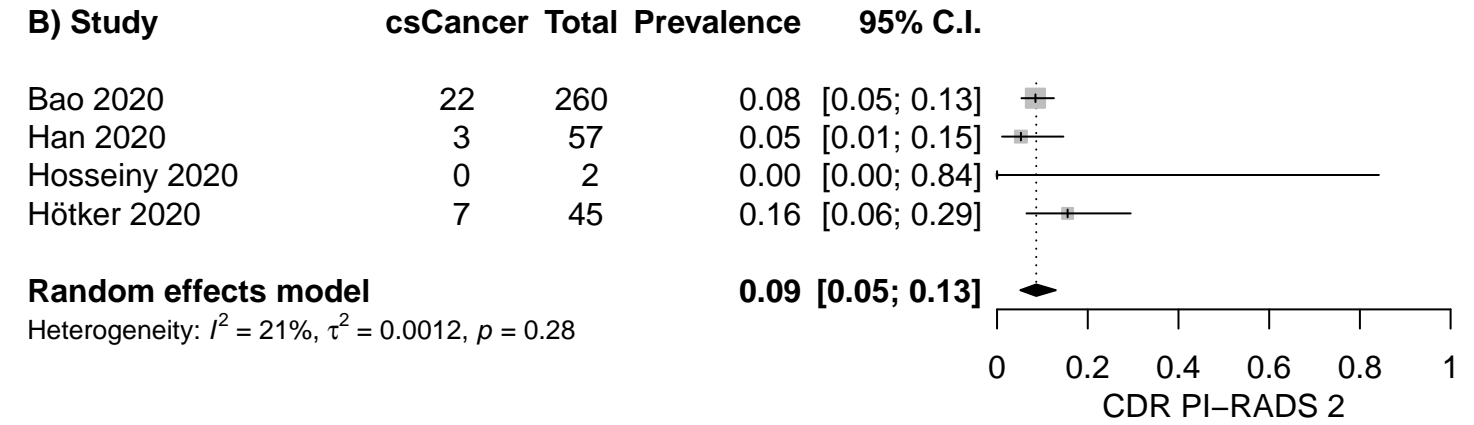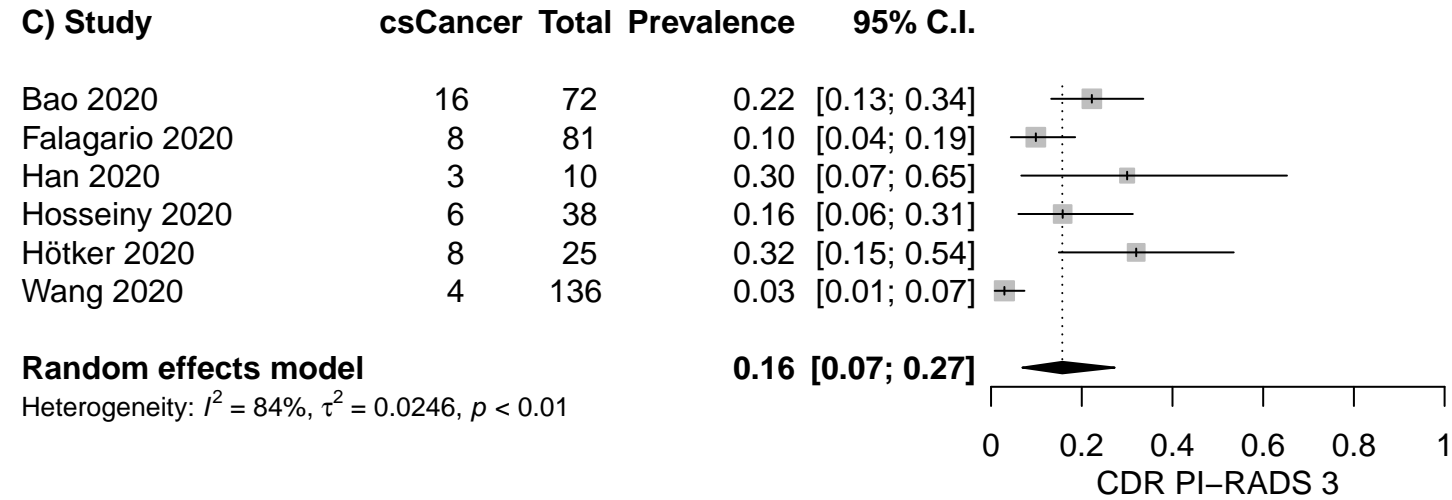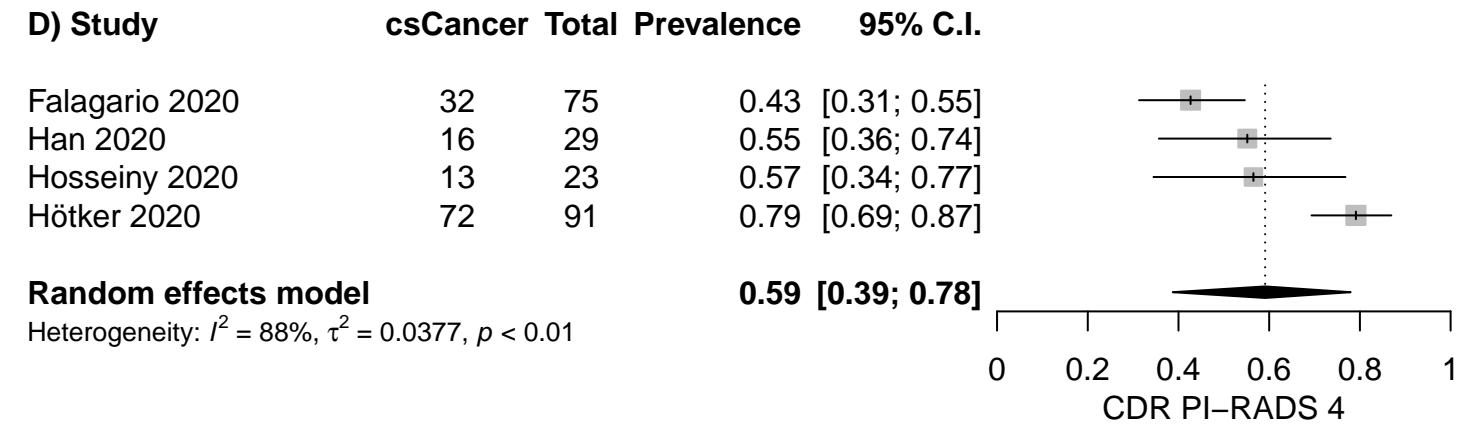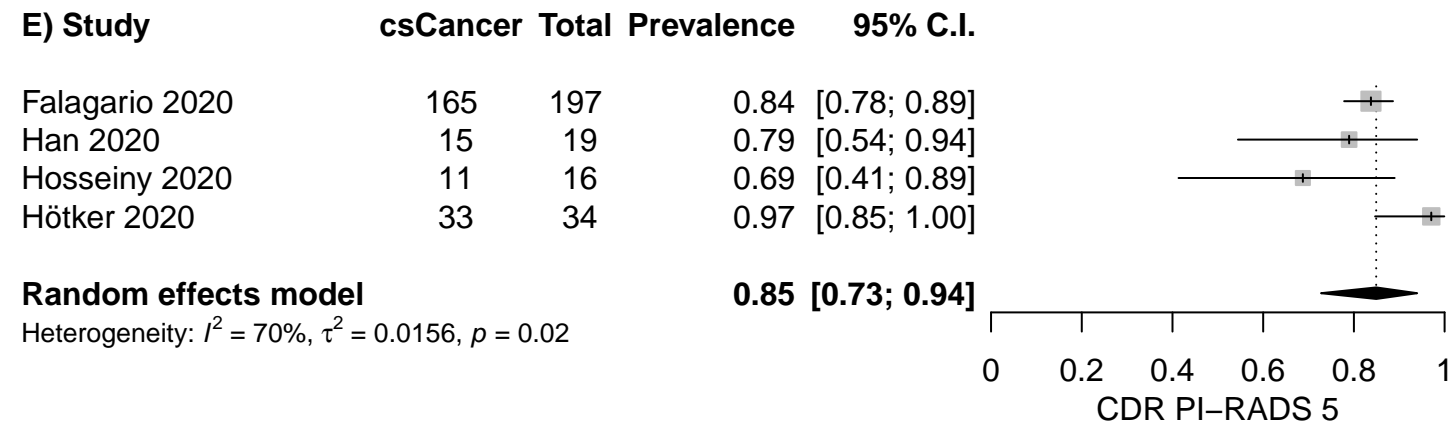

Supplementary figure 2 (lesion level, outcome: any cancer)

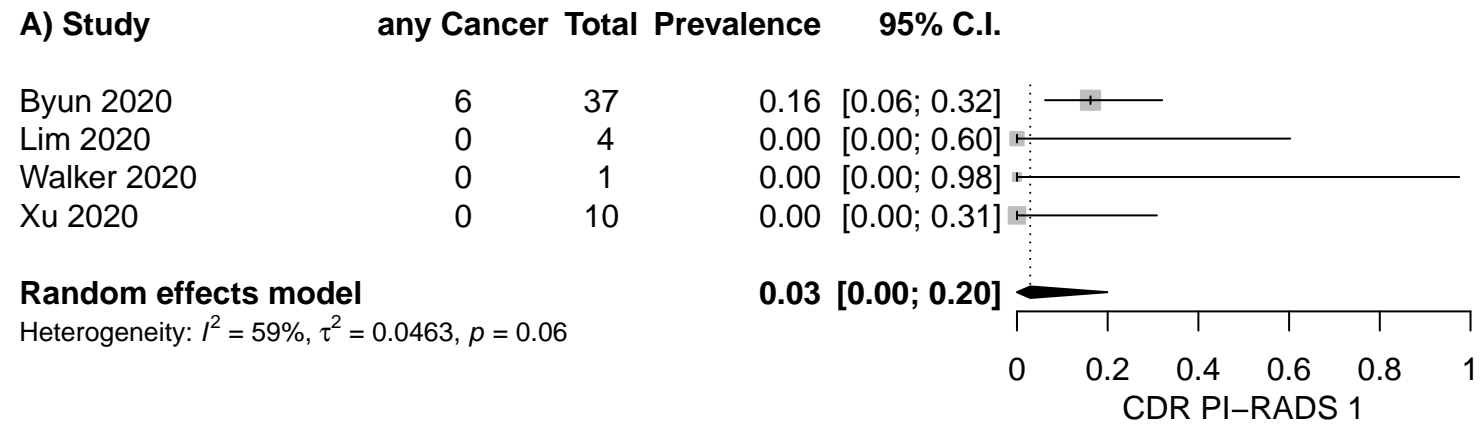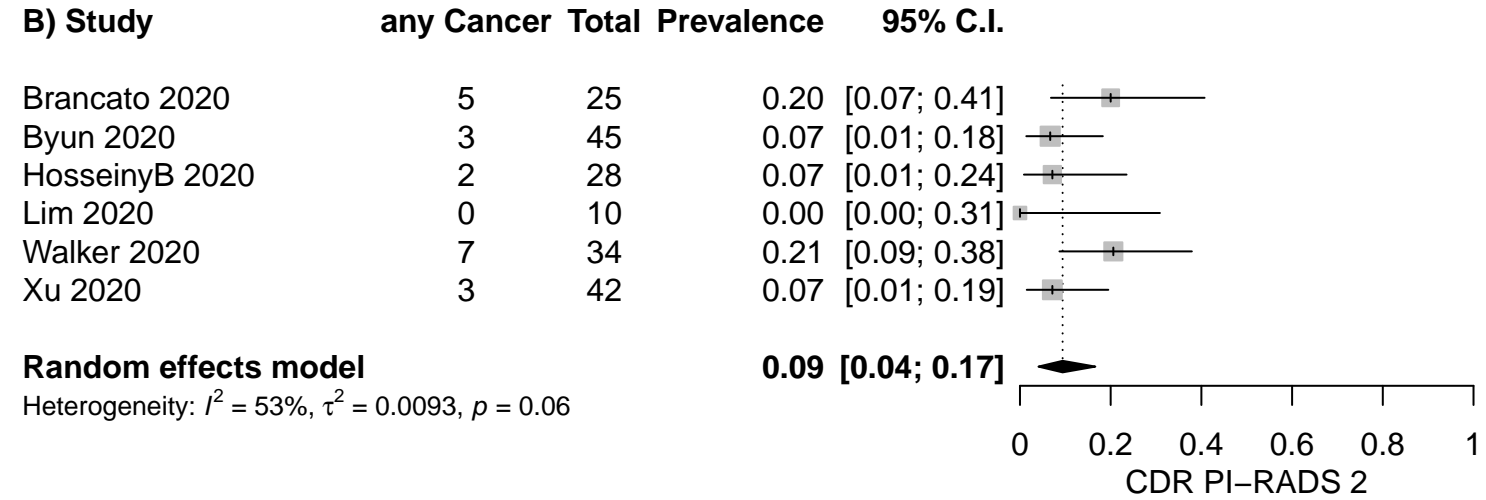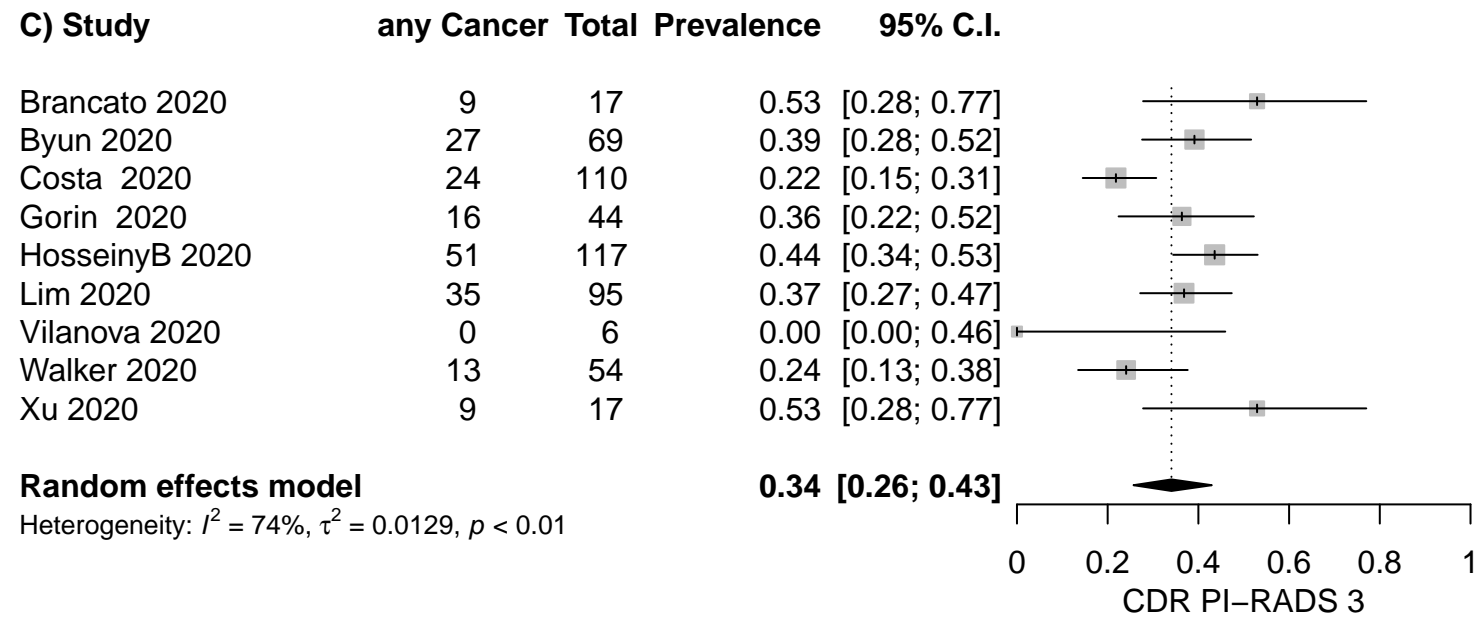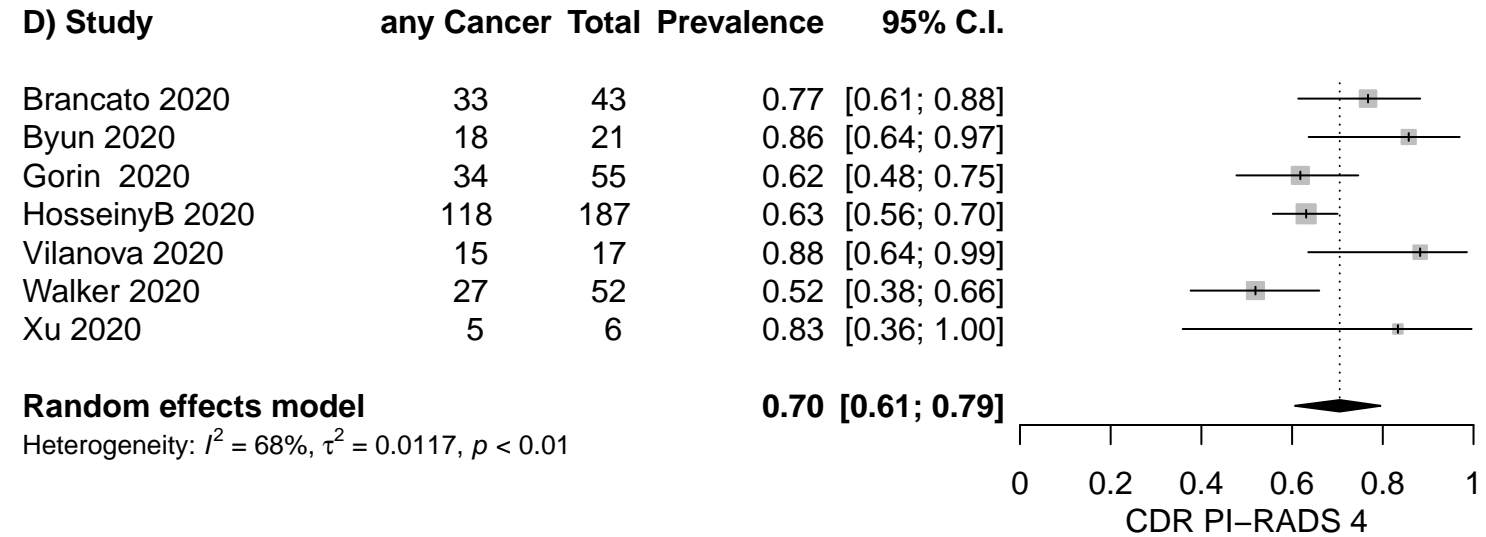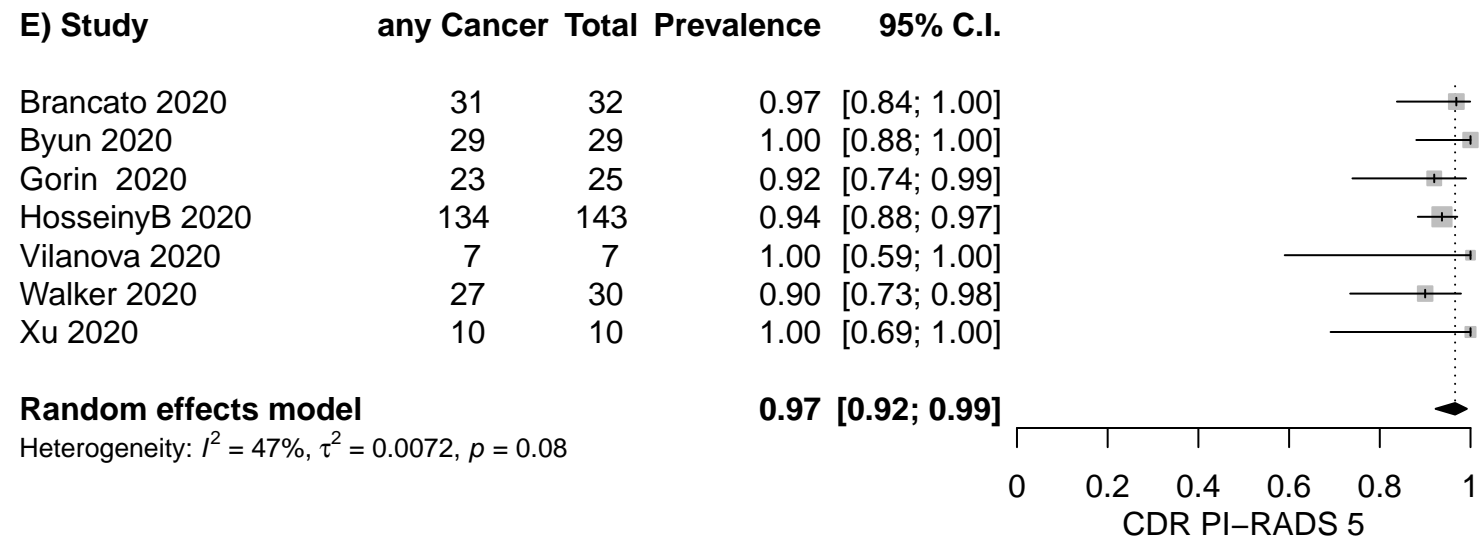

Supplementary figure 3 (patient level, outcome: any cancer)

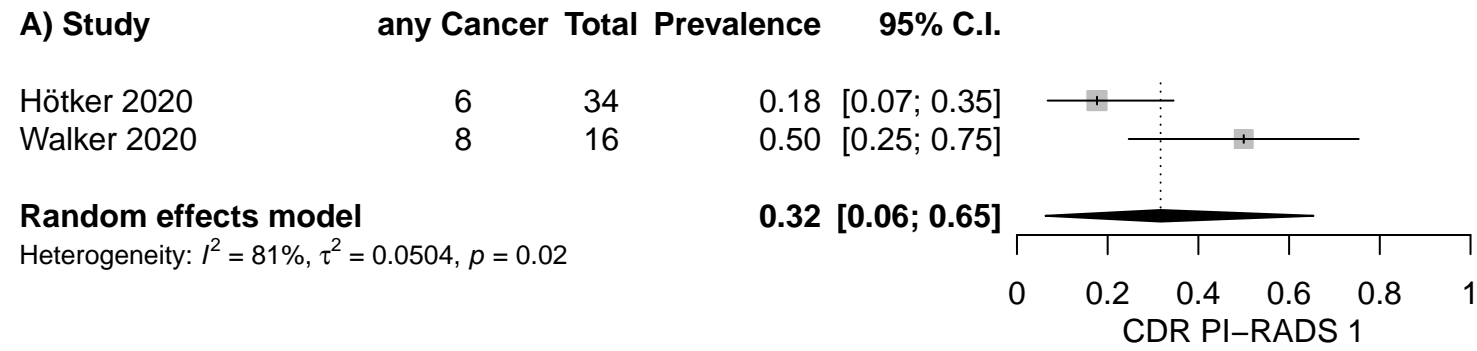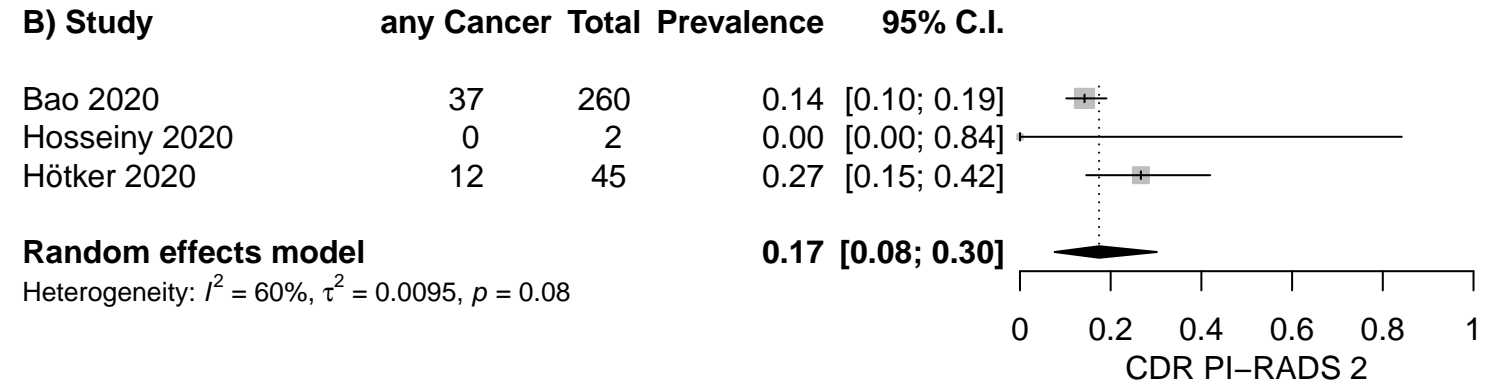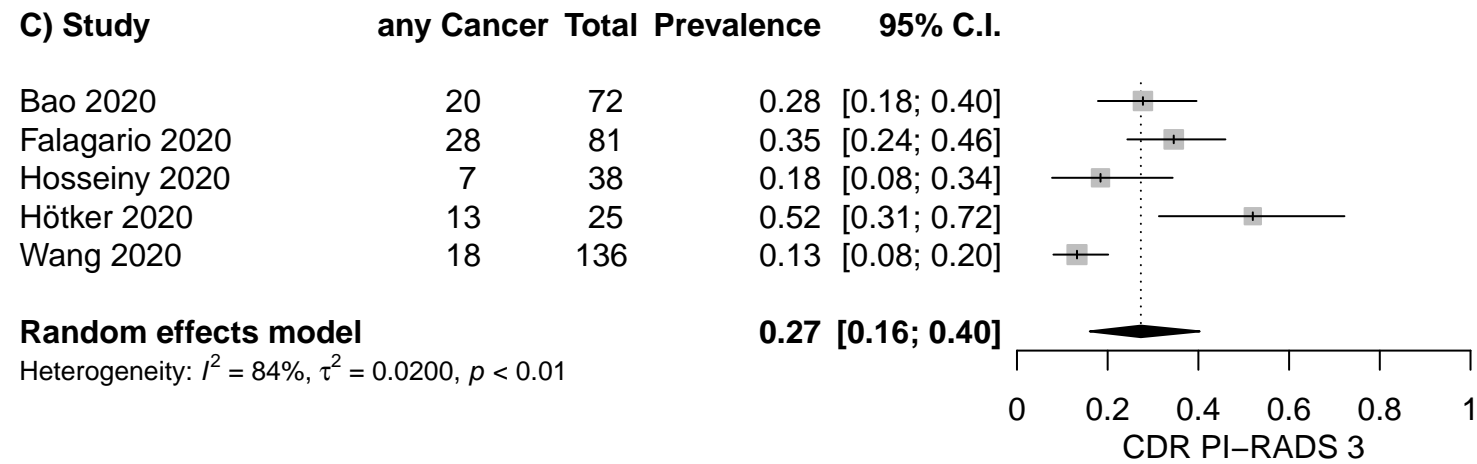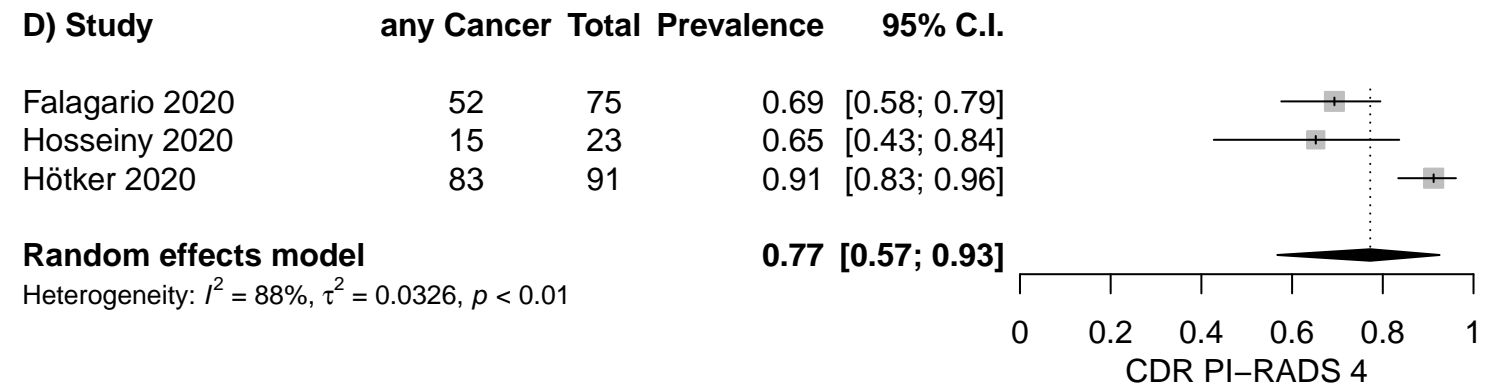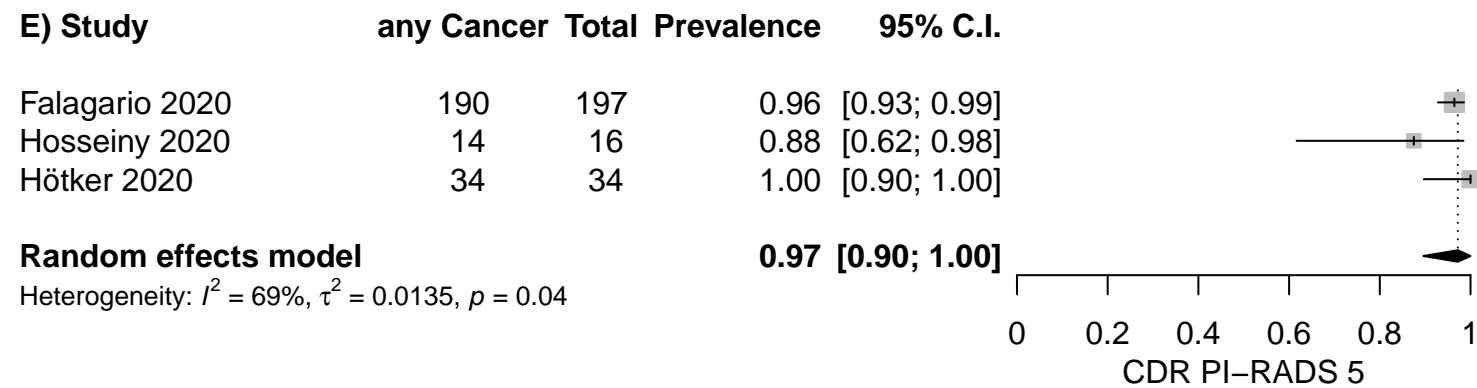

Supplementary figure 4 (lesion level, outcome: cs cancer)

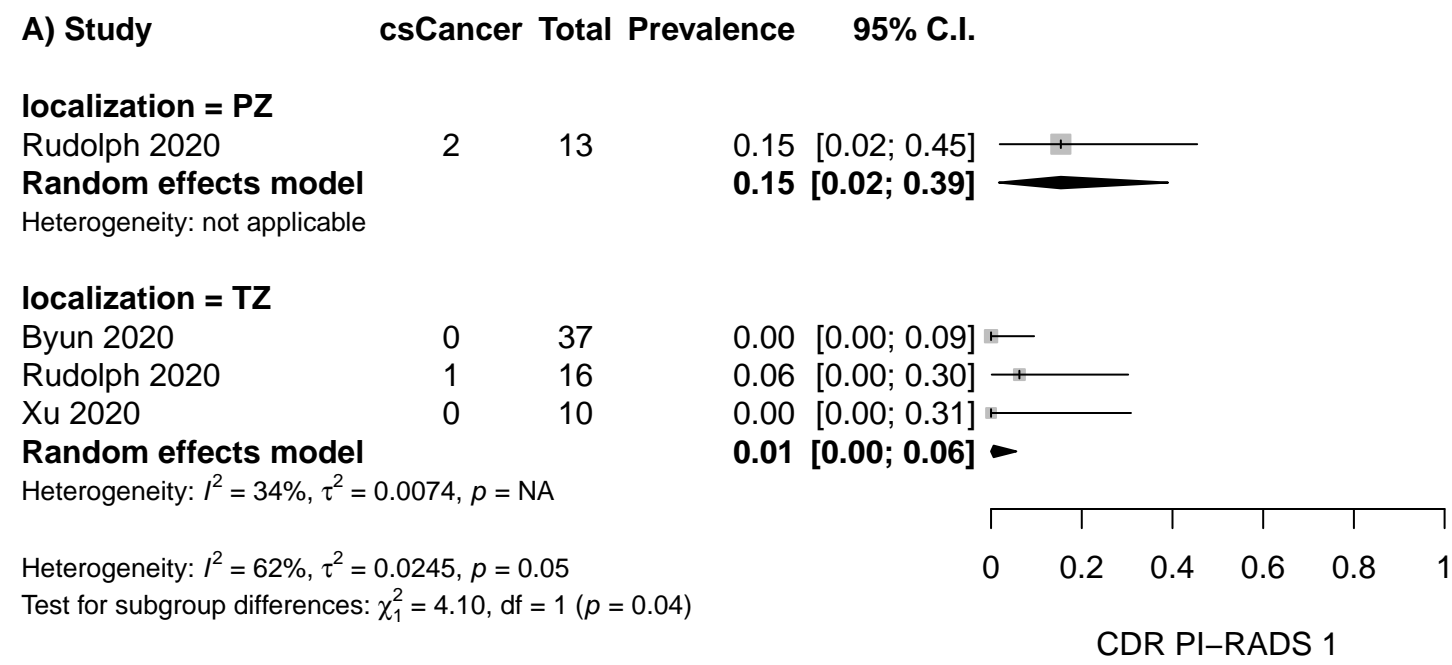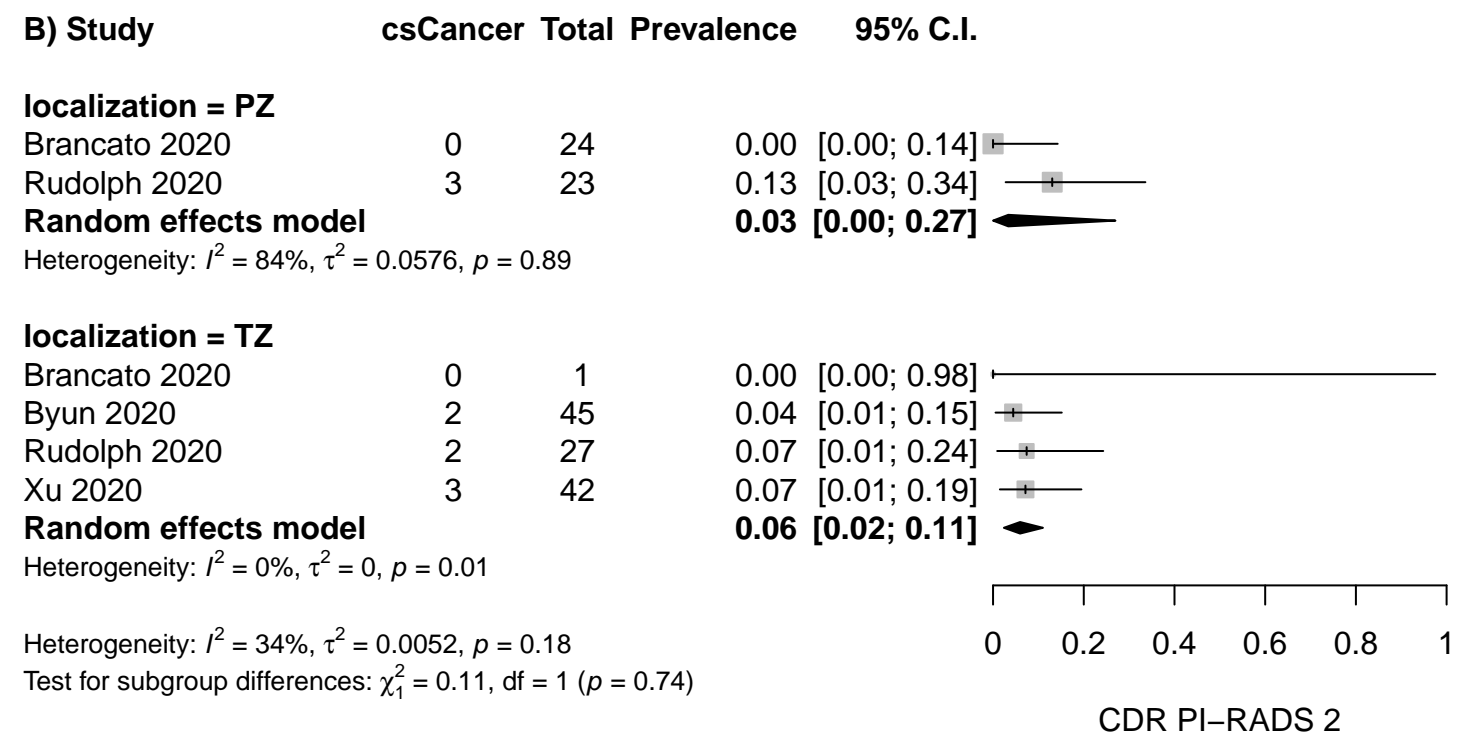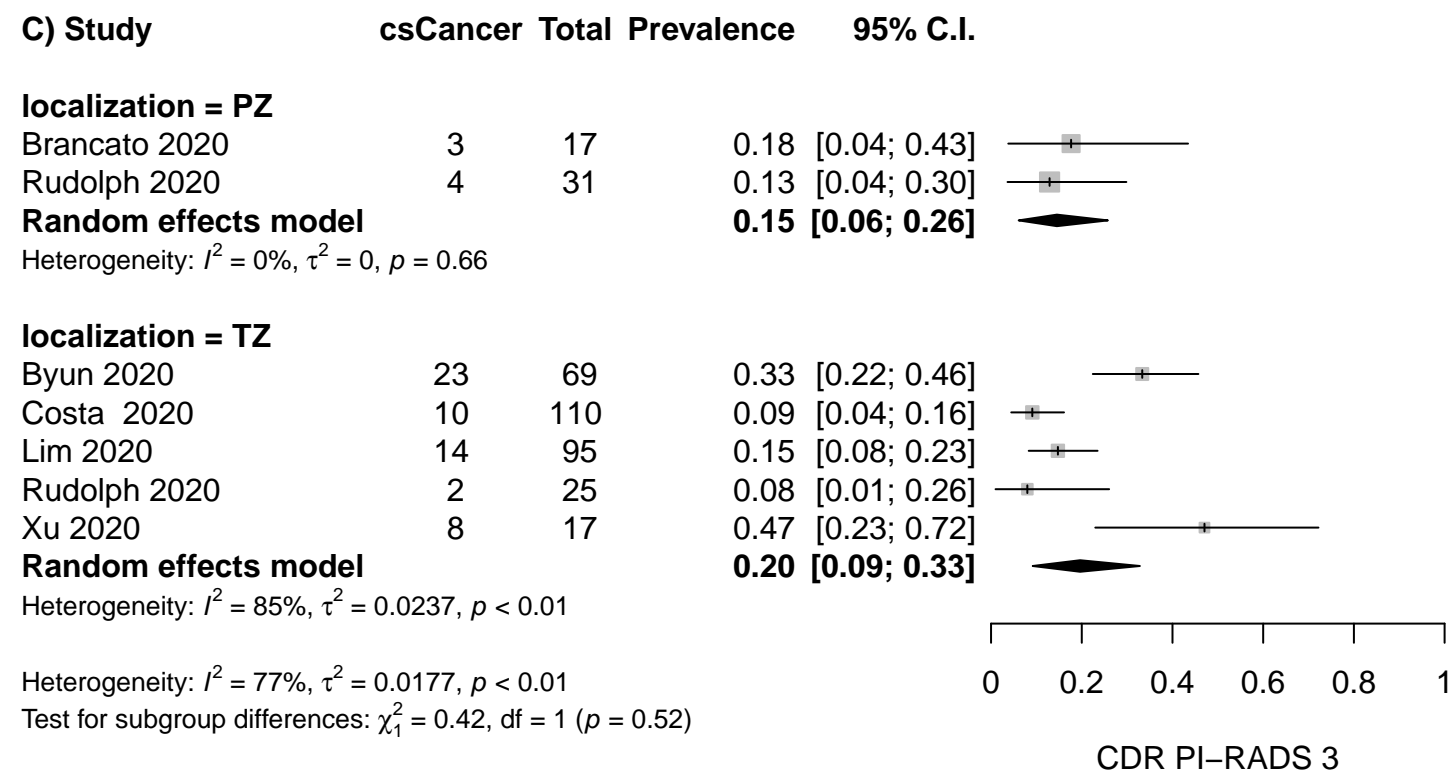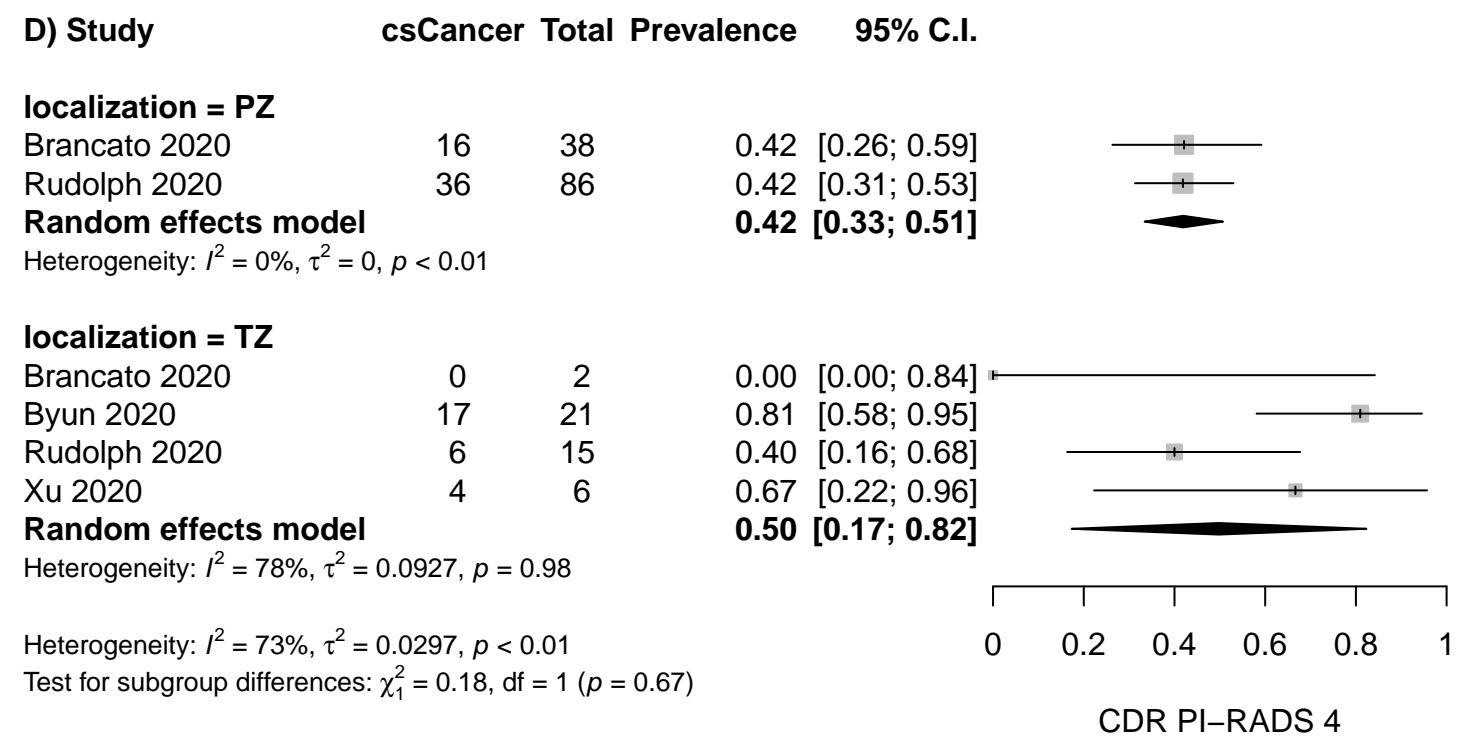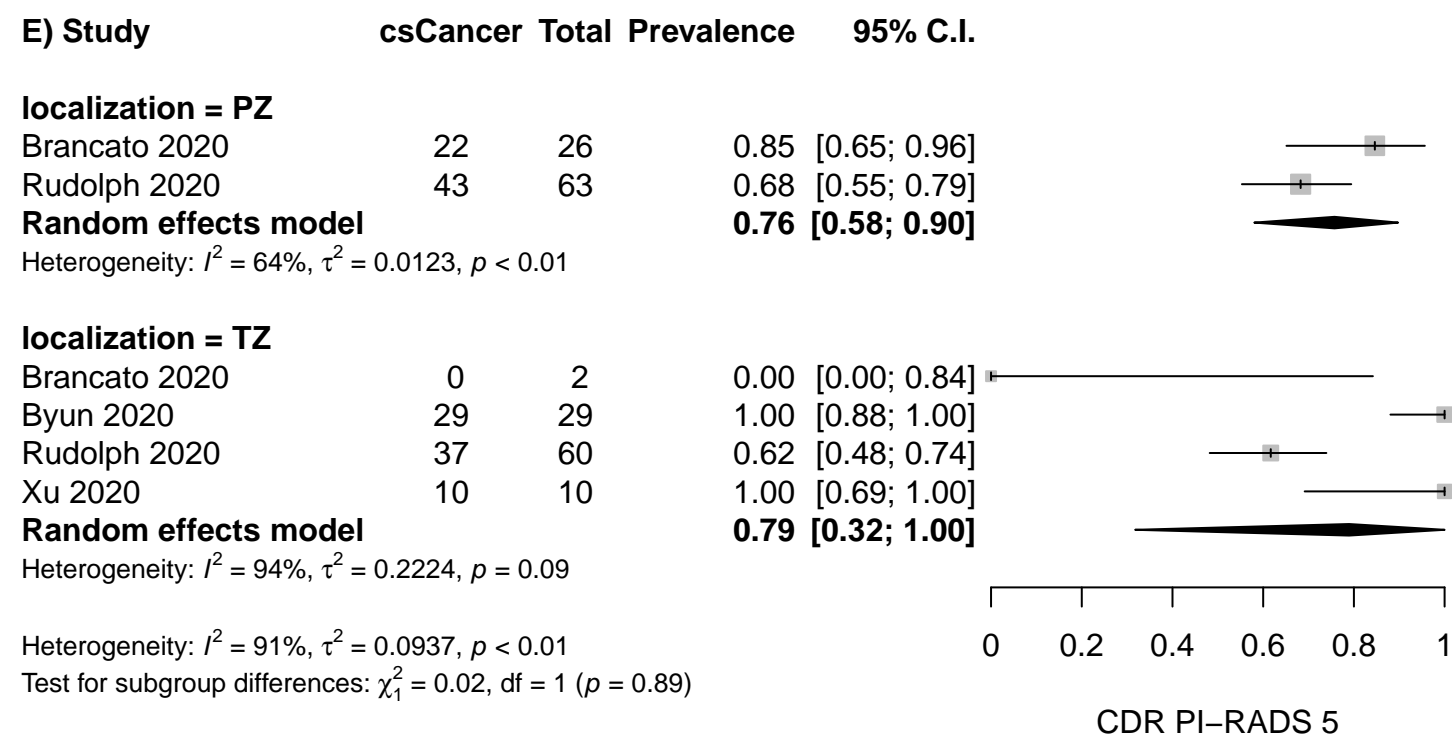

## Supplementary figure 5

### A

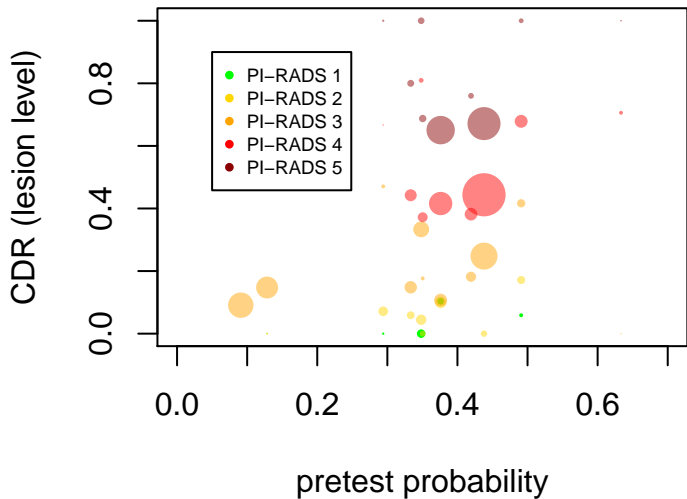

### B

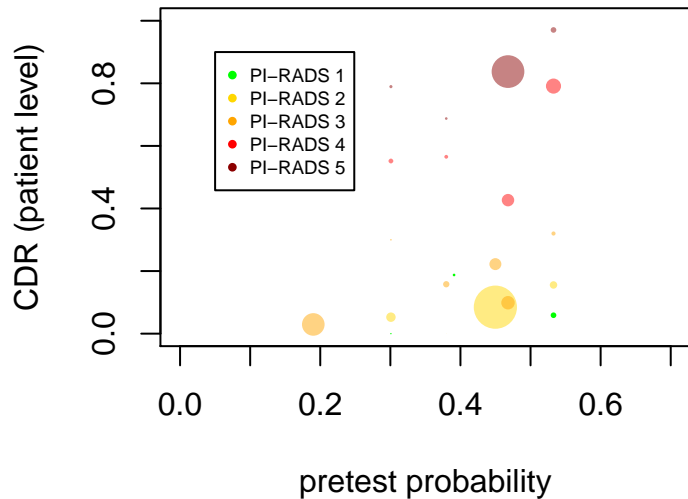

# Supplementary figure 6

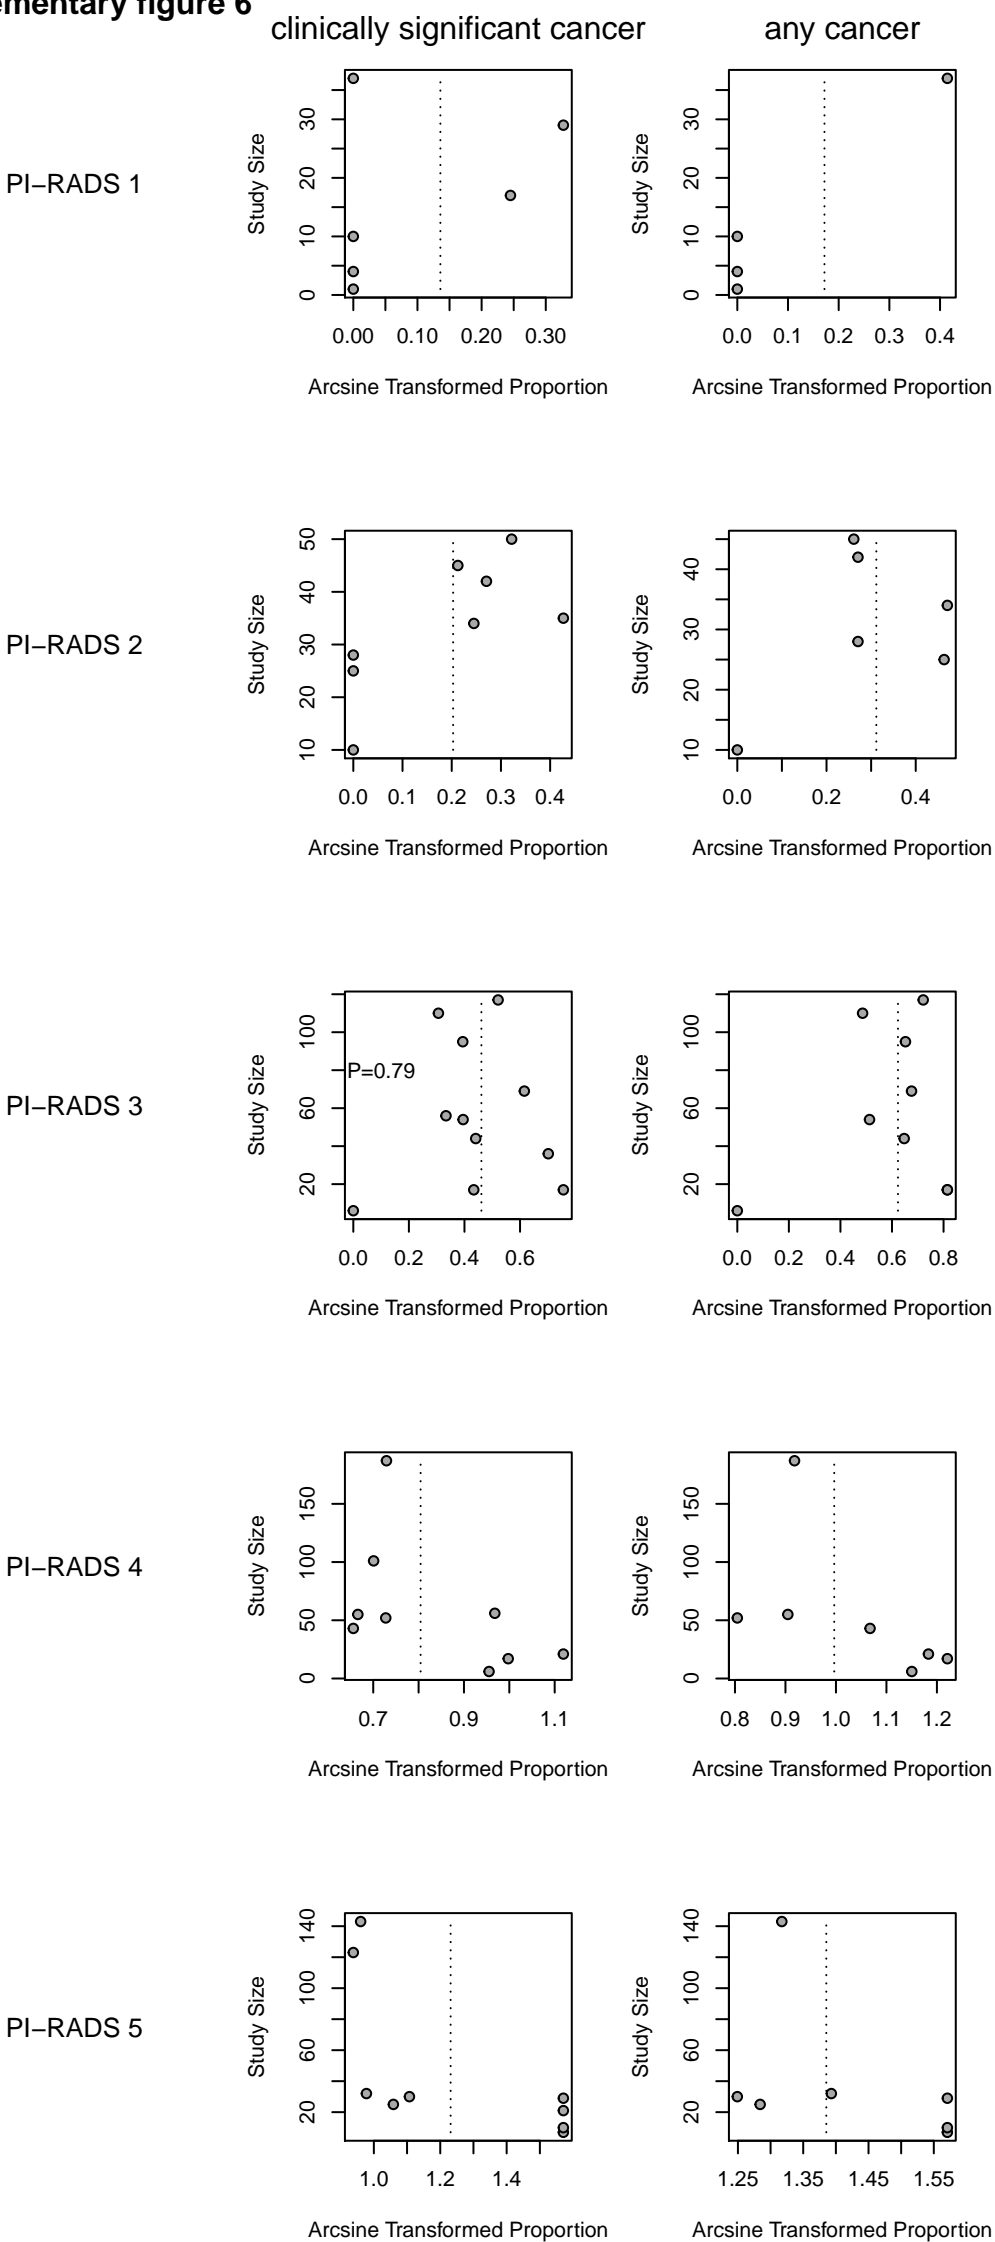

# Supplementary figure 7

clinically significant cancer

any cancer

PI-RADS 1

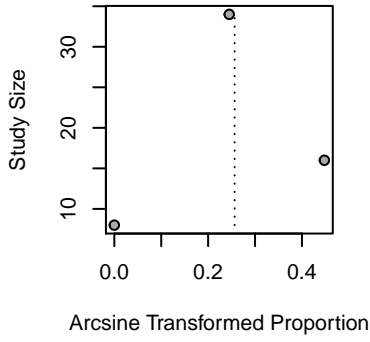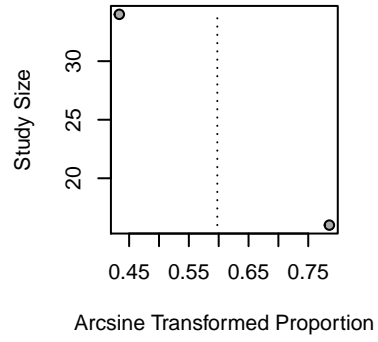

PI-RADS 2

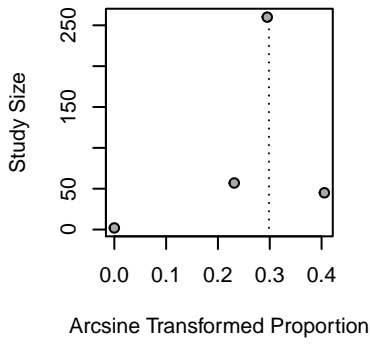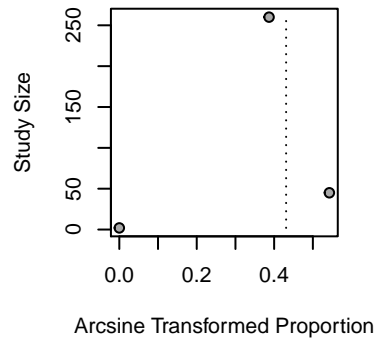

PI-RADS 3

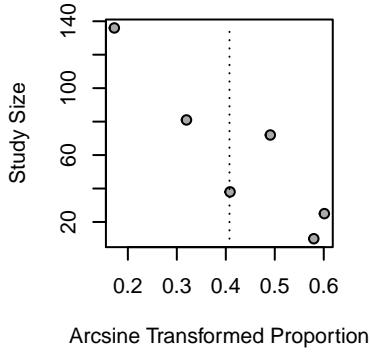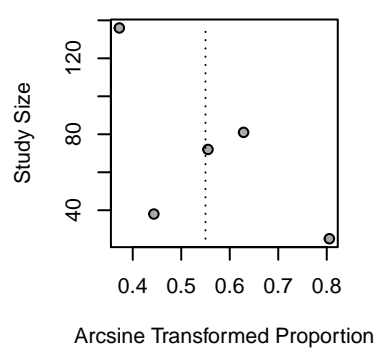

PI-RADS 4

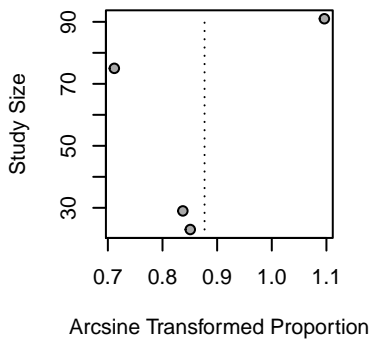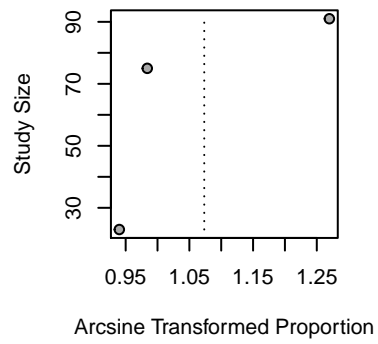

PI-RADS 5

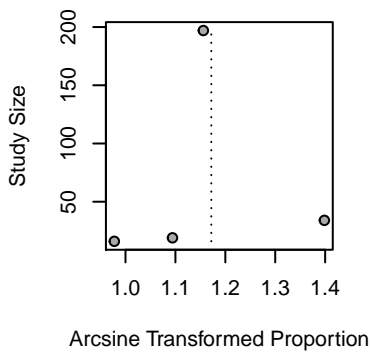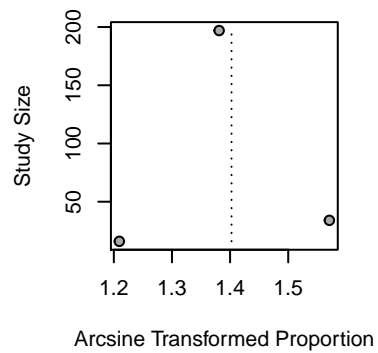

## Supplementary Figure Captions

**Supplementary figure 1:** Forest plots of patient level analysis, cancer detection rates of PI-RADSv2.1 assessment categories for clinically significant cancer as outcome variable. **A)** PI-RADS 1, **B)** PI-RADS 2, **C)** PI-RADS 3, **D)** PI-RADS 4, **E)** PI-RADS 5.

**Supplementary figure 2:** Forest plots of lesion level analysis, cancer detection rates of PI-RADSv2.1 assessment categories for any cancer as outcome variable. **A)** PI-RADS 1, **B)** PI-RADS 2, **C)** PI-RADS 3, **D)** PI-RADS 4, **E)** PI-RADS 5.

**Supplementary figure 3:** Forest plots of patient level analysis, cancer detection rates of PI-RADSv2.1 assessment categories for any cancer as outcome variable. **A)** PI-RADS 1, **B)** PI-RADS 2, **C)** PI-RADS 3, **D)** PI-RADS 4, **E)** PI-RADS 5.

**Supplementary figure 4:** Forest plots of lesion level analysis, cancer detection rates of PI-RADSv2.1 assessment categories for clinically significant cancer as outcome variable, stratified by lesion localization (peripheral zone versus transition zone); given this information is provided. **A)** PI-RADS 1, **B)** PI-RADS 2, **C)** PI-RADS 3, **D)** PI-RADS 4, **E)** PI-RADS 5. From the study of Brancato et al. 7 lesions are excluded from this analysis because they are rated as central zone tumors.

**Supplementary figure 5:** Dependence of cancer detection rate (clinically significant cancer) on lesion level (**A**) and patient level (**B**) from pretest probability. Size of the data points is proportional to sample size.

**Supplementary figure 6:** Funnel plots of lesion level analysis. Rows are PI-RADS assessment categories, column 1 is the analysis for clinically significant cancer as outcome variable, column 2 is the analysis for any cancer as outcome variable.

**Supplementary figure 7:** Funnel plots of patient level analysis. Rows are PI-RADS assessment categories, column 1 is the analysis for clinically significant cancer as outcome variable, column 2 is the analysis for any cancer as outcome variable.



**Supplementary Table 1: MRI examinations and case readings**

| Author (ref. No) | Field strength              | One scanner / different scanners | Endorectal coil    | Spasmolytic agent | N readers | Years experience prostate MRI* | Slice thickness / GAP T2 | FOV T2      | Slice thickness / GAP DWI | FOV DWI | high b-Value            | Slice thickness / GAP DCE | FOV DCE        |
|------------------|-----------------------------|----------------------------------|--------------------|-------------------|-----------|--------------------------------|--------------------------|-------------|---------------------------|---------|-------------------------|---------------------------|----------------|
| Bao [19]         | 3T                          | two scanners, same model         | no                 | unclear           | 2         | 12                             | 3.5/NR                   | 20x20-25x25 | 3.5/NR                    | 20x20   | 2000                    | 3/NR                      | 24x24          |
| Brancato [20]    | 1.5T                        | one scanner                      | yes                | unclear           | 3         | 10                             | 3/NR                     | 20x20       | 3/NR                      | 25x25   | 1400                    | 3.5/NR                    | 20.8x41.7      |
| Byun [21]        | 3T                          | different scanners               | no                 | yes               | 3         | >3                             | 3/0                      | 18x18       | 3/0                       | 18x18   | 1500                    | 6/0                       | 18x18          |
| Costa [22]       | 3T                          | one scanner                      | yes                | unclear           | 11        | 20                             | 3/0                      | 18x18       | 3/0                       | 16x16   | 2000                    | NR/NR                     | NR             |
| Falagario [23]   | 1.5T and 3T                 | different scanners               | no                 | unclear           | NR        | NR                             | NR/NR                    | NR          | NR/NR                     | NR      | NR                      | NR/NR                     | NR             |
| Gorin [24]       | NR                          | NR                               | NR                 | unclear           | NR        | NR                             | NR/NR                    | NR          | NR/NR                     | NR      | NR                      | NR/NR                     | NR             |
| Han [25]         | 3T                          | one scanner                      | no                 | unclear           | 2         | >5                             | 4/NR                     | 24x24-26x26 | 4/NR                      | 26x26   | 1400 (1200 before 2015) | 2/NR                      | 26x26 or 36x36 |
| Hosseiny [26]    | 3T                          | different scanners               | no                 | yes               | 4         | NR                             | 1.5/NR                   | 21x21       | 3.6/NR                    | 21x26   | 1400                    | 3.6/NR                    | 26x26          |
| HosseinyB [27]   | 3T                          | different scanners               | no                 | yes               | 2         | 15                             | 1.5/NR                   | 21x21       | 3.6/NR                    | 21x26   | 1400                    | 3.6/NR                    | 26x26          |
| Hötker [28]      | 3T                          | two scanners, same model         | mixed              | unclear           | 2         | >5                             | NR/NR                    | NR          | NR/NR                     | NR      | 1400                    | NR/NR                     | NR             |
| Lim [29]         | 3T                          | one scanner                      | no                 | unclear           | 3         | 7                              | 3/0                      | 22x22       | 4/0                       | 22x22   | 1600-2000               | 4/0                       | 22x22          |
| Rudolph [30]     | 3T                          | two scanners, same model         | unclear            | unclear           | 3         | >5                             | 3/NR                     | 18x18       | 3/NR                      | 17x17   | 1400                    | 3/NR                      | 18.6x18.6      |
| Tamada [31]      | 3T                          | different scanners               | no                 | yes               | 3         | 22                             | 3/0                      | 20x20       | 3/0                       | 30x30   | 2000                    | 3.5 or -4/0               | 25x25 or 35x35 |
| Vilanova [32]    | 1.5T, NR for second scanner | different scanners               | no, outside MRI NR | unclear           | 2         | 24                             | NR/NR                    | NR          | NR/NR                     | NR      | NR                      | NR/NR                     | NR             |
| Walker [33]      | 3T                          | one scanner                      | mixed              | unclear           | 1         | 13                             | NR/NR                    | NR          | NR/NR                     | NR      | 2000                    | NR/NR                     | NR             |
| Wang [34]        | 3T                          | one scanner                      | no                 | unclear           | 2         | 10                             | 3/NR                     | 22x22       | 3/NR                      | 26x26   | 1000                    | 3/NR                      | 22x22          |
| Xu [35]          | 3T                          | one scanner                      | no                 | unclear           | 2         | 6                              | 3/NR                     | 27x27       | 3/NR                      | 36x36   | 1500 or 2000            | 3/NR                      | 40x40          |

\*most experienced reader, NR: not reported
